## RESEARCH ARTICLE

## Palliative care in Mozambique: Physicians' knowledge, attitudes and practices

Emilia Pinto<sup>1,2,3\*</sup>, Gustavo Marcos<sup>3,4</sup>, Camila Walters<sup>5</sup>, Ferraz Gonçalves<sup>1,6</sup>, Jahit Sacarlal<sup>4</sup>, Luisa Castro<sup>7</sup>, Guilhermina Rego<sup>1</sup>

**1** School of Medicine, Porto University, Porto, Portugal, **2** Pain Unit, Maputo Central Hospital, Maputo, Mozambique, **3** Anesthesiology Department, Maputo Central Hospital, Maputo, Mozambique, **4** School of Medicine, Universidade Eduardo Mondlane, Maputo, Mozambique, **5** Anesthesiology Department, Vanderbilt University, Nashville, Tennessee, United States of America, **6** Palliative Care Service, Portuguese Oncology Institute, Lisbon, Portugal, **7** Center for Health Technology and Services Research (CINTESIS), University of Porto, Porto, Portugal

\* [emiqidade@gmail.com](mailto:emiqidade@gmail.com)

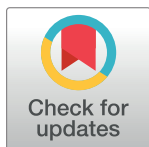

## OPEN ACCESS

**Citation:** Pinto E, Marcos G, Walters C, Gonçalves F, Sacarlal J, Castro L, et al. (2020) Palliative care in Mozambique: Physicians' knowledge, attitudes and practices. PLoS ONE 15(8): e0238023. <https://doi.org/10.1371/journal.pone.0238023>

**Editor:** Kevan Hartshorn, Boston University School of Medicine, UNITED STATES

**Received:** July 24, 2019

**Accepted:** July 16, 2020

**Published:** August 24, 2020

**Copyright:** © 2020 Pinto et al. This is an open access article distributed under the terms of the [Creative Commons Attribution License](https://creativecommons.org/licenses/by/4.0/), which permits unrestricted use, distribution, and reproduction in any medium, provided the original author and source are credited.

**Data Availability Statement:** All relevant data are within the paper.

**Funding:** EP was supported by Calouste Gulbenkian Foundation grant number N°. 144879. Travel expenses for data collections in the 4 hospitals was supported by the Ministry of Health of Mozambique (MISAU).

**Competing interests:** One of the authors is a member of the ethics committee, but he did not participate in the project's approval. This does not alter our adherence to PLOS ONE policies on sharing data and materials.

## Abstract

### Background

Palliative care is an essential part of medical practice but it remains limited, inaccessible, or even absent in low and middle income countries.

### Objectives

To evaluate the general knowledge, attitudes, and practices of Mozambican physicians on palliative care.

### Methods

A cross-sectional observational study was conducted between August 2018 and January 2019 in the 3 main hospitals of Mozambique, in addition to the only hospital with a stand-alone palliative care service. Data was collected from a self-administered survey directed to physicians in services with oncology patients.

### Results

Two hundred and seven out of 306 physicians surveyed answered the questionnaire. The median physician age was 38 years. Fifty-five percent were males, and 49.8% residents. The most common medical specialty was surgery with 26.1%. Eighty percent of physicians answered that palliative care should be provided to patients when no curative treatments are available; 87% believed that early integration of palliative care can improve patients' quality of life; 73% regularly inform patients of a cancer diagnosis; 60% prefer to inform the diagnosis and prognosis to the family/caregivers. Fifty percent knew what a "do-not-resuscitate" order is, and 51% knew what palliative sedation is. Only 25% of the participants answered correctly all questions on palliative care general knowledge, and only 24% of the participants knew all answers about euthanasia.

## Conclusions

Mozambican physicians in the main hospitals of Mozambique have cursory knowledge about palliative care. Paternalism and the family-centered model are the most prevalent. More interventions and training of professionals are needed to improve palliative care knowledge and practice in the country.

## Background

Palliative care is an essential part of medical practice but it remains limited, inaccessible, or even absent in low and middle income countries (LMICs). There is often a limited number of specialized professionals, delayed detection of pathologies, and inaccessible and insufficient treatment options in these countries. Palliative care availability is an urgent need aggravated by increasing global oncologic prevalence, which is expected to double in 2 decades, with fifty percent of these cancers occurring in LMICs [1]. In a recent study of 48 African countries, 19% had no hospices or hospice services and only 22% had documented hospice polices, with rare exceptions such as Uganda, Kenya and South Africa. Few countries in Africa have organized palliative care systems [2].

According to the Joint United Nations Programme on HIV/AIDS (UNAIDS), Mozambique has the world's third highest HIV prevalence at 13.2%. The World Alliance of Hospice and Palliative Care (WHPCA), states that most people living with HIV / AIDS who need such care are in Africa, with 78% of adult patients in LMICs. Forty-nine percent of children with palliative care needs in the whole world are in Africa [3].

Mozambique is one of the 11 African countries with palliative care policies, and one of the 6 African countries along with Rwanda, Swaziland, Tanzania, Zimbabwe, and Malawi, that provide a standalone palliative care service. However, in Mozambique, palliative care access is limited and not fully integrated into the health care system. There are knowledge gaps and undesirable attitudes by policymakers and healthcare professionals [4]. The African Palliative Care Association recommends palliative care content to be integrated in training curricula for health care workers in Mozambique [4] and it is important that it includes both theoretical knowledge and practical skills [5].

Few studies have been published about palliative care in Mozambique [2]. In this study we survey knowledge, attitudes and practices of Mozambique physicians in relation to palliative care philosophy, disclosure of diagnosis, breaking bad news, therapeutic approach, and end-of-life decisions. This is the first survey of its kind in Mozambique.

## Methods

A cross-sectional study was carried out between August 2018 and January 2019 in Mozambique at the major hospitals in the southern, central, and northern regions of the country—Maputo, Beira, and Nampula—as well as Xai-Xai Provincial Hospital (XXPH), the only hospital with a standalone palliative care service in Mozambique.

To ensure adequate accuracy in our proportion estimates, we compute the desired sample size for a 95% confidence interval, an accuracy of 0.05 and an expect proportion of 0.50, generating a sample size of 306 participants from a population of 868 physicians in the 4 hospitals: Maputo—553 (195), Beira— 163 (57), Nampula— 118 (42) and Xai-Xai— 34 (12) physicians.

The study was directed to physicians—general practitioners, residents and specialists—in the main hospital services with oncological patients: medicine, gynecology, surgery, urology, pain, oncology, dermatology, pediatrics, otorhinolaryngology, maxillofacial, surgery, gastroenterology, ophthalmology, emergency medicine, and orthopedics services. Surveys were distributed in paper and self-administered. The principal investigator and trained pain professionals distributed the surveys and informed consents, consecutively, to all physicians present at the services during the study period, willing to participate in the study. Physicians were informed about the study aims and the importance of their responses to the completion of the study. When available, physicians answered the surveys and the team collected the survey immediately, otherwise answered surveys were collected in the end of the shift.

The applied survey (Mozambique Palliative Care Knowledge and Attitudes Survey or MPCKAS) was the result of merging a modified questionnaire conducted in China [6] and another led in Portugal [7]. From the Chinese survey, we used questions related to demographic data, concept and philosophy of palliative care, disclosure of diagnosis, breaking bad news and end of life issues (Q1–Q12; Q18–Q29). From the Portuguese survey, we used questions complementary to the questions above for diagnosis information and treatment decision (Q13–Q17). By applying a blend of these 2 questionnaires we intended to relate physicians's knowledge to their attitudes and practices. The pre-final survey, in Portuguese, was obtained from a process that includes translation and back-translation, performed by two professional translators and revised by a team of experts from the Portuguese Oncology Institute, according to published guidelines for translation and validation of surveys [8].

The pre-final version of the questionnaire obtained in the translation process was then revised by a committee of experts, consisting of physicians from several services in the four hospitals (15 from MCH, 15 from BCH, 10 from NCH and 3 from XXPH). The committee revised the pre-final survey regarding the adequacy and relevance of its content and clarity of questions. The expert committee approved unanimously the pre-final version of the questionnaire, which was then considered as MPCKAS final version. However, the committee recommended that participants should be clarified regarding the meaning of “hospice” (“*hospício*” in Portuguese) since the common meaning of that word in Portuguese speaking countries is a medical institution where specialized care is provided to patients with mental disorders, and not an institution that focuses on the palliative support of terminally ill patients.

The MPCKAS assesses knowledge, attitudes and practices of physicians covering issues related to palliative care, and includes six categories: 1) demographic; 2) concept and philosophy of palliative care; 3) disclosure of diagnosis and breaking bad news; 4) therapeutic decision issues; 5) end-of-life decision making issues and 6) euthanasia.

Physicians who consented to participate in the study were included. Unanswered surveys were excluded. Descriptive statistics were used as appropriate: absolute and relative frequencies for categorical variables and medians with 95% confidence intervals (95% CI) for age and clinical practice, in years. To evaluate independence between categorical variables, chi-squared test for independence was used. Normality of quantitative variables was verified by visual analysis of histograms and confirmed by Kolmogorov-Smirnov test. For mean comparison of normally distributed quantitative variables, Student t-test was performed. In the case of non-normally distributed quantitative variables, the nonparametric Mann-Whitney test was used. All the information collected was analyzed with SPSS software (v. 25). In all statistical tests, p-values were considered significant if less or equal to 0.05.

The study was approved by the Institutional Committee of Bioethics for Health of the Faculty of Medicine & Maputo Central Hospital with number CIBS FM&HCM/08/2018 and by the Bioethics Committee of the Faculty of Medicine of the University of Porto.

## Results

### 1. General characteristics and professional category

Two hundred and seven of the 306 distributed surveys were fully answered and therefore analyzed, resulting in response rates of 69.1% in Maputo Central Hospital (MCH), 90.6% in Beira Central Hospital (BCH), 64.9% in Nampula Central Hospital (NCH) and 75% in Xai-Xai Provincial Hospital (XXPH), conducting to an overall response rate of 67.6%. Respondents had a median age of 38 years and 54.6% were male. Thirteen percent were general practitioners, 40.1% specialists, and 46.9% residents (Table 1).

### 2. General knowledge and attitudes in palliative care (Q1-Q9)

The percentage of correct answers referring to general knowledge and attitude in palliative care ranged between 55.7% and 94.1%. Only 25% of the participants correctly answered all five questions (Q1-Q5, see Table 2 for more detailed information).

Two main items were considered when referring oncology patients to palliative care: when patients could not undertake surgery, radiotherapy, chemotherapy and other anti-cancer therapies (83.8%) and when the patients' symptoms could no longer be adequately controlled (40.7%). Only 14.7% of the participants believed that referral to palliative care should be made when cancer is first diagnosed, although 87.3% believed that early palliative care integration can improve patient's quality of life (Q9).

**Table 1. Physicians' demographic and professional characteristics (N = 207).**

| Variables                       |            |
|---------------------------------|------------|
| Age in years, median [95% CI]   | 38 (36–40) |
| Age groups in years, n (%)      |            |
| 25–34                           | 76 (36.7)  |
| 35–44                           | 69 (33.3)  |
| 45–54                           | 45 (21.7)  |
| 55–65                           | 17 (8.2)   |
| Practise years, median [95% CI] | 9 (8–11)   |
| Practise years groups, n (%)    |            |
| 0–13                            | 138 (66.7) |
| 14–27                           | 48 (23.2)  |
| 28–41                           | 21 (10.1)  |
| Professional category, n (%)    |            |
| General Clinic                  | 27 (13.0)  |
| Resident                        | 103 (49.8) |
| Specialist                      | 77 (37.2)  |
| Sex, n (%)                      |            |
| Male                            | 113 (54.6) |
| Female                          | 94 (45.4)  |
| Main specialties*, n (%)        |            |
| Surgery                         | 44 (26.1)  |
| Pediatrics                      | 26 (15.8)  |
| Gynecology                      | 24 (14.5)  |
| Medicine                        | 23 (13.9)  |

\*Only 165 professionals gave information.

<https://doi.org/10.1371/journal.pone.0238023.t001>

**Table 2. General palliative care knowledge and attitudes.**

| Q1-Q6 questions                                                                                                   | n (%)      |
|-------------------------------------------------------------------------------------------------------------------|------------|
| <sup>a</sup> Q1. PC should be provided for patients for whom there is not another alternative treatment (N = 206) | 164 (79.6) |
| <sup>a</sup> Q2. PC should be done without any other ongoing treatment (N = 204)                                  | 153 (75.0) |
| <sup>a</sup> Q3. PC has different meanings for each individual (N = 202)                                          | 190 (94.1) |
| <sup>a</sup> Q4. Accepting death is a requirement to participate in PC (N = 203)                                  | 113 (55.7) |
| <sup>a</sup> Q5. There is no difference between PC and hospice (N = 200)                                          | 144 (72.0) |
| Participants who answered correctly Q1 to Q5. (N = 192)                                                           | 48 (25.0)  |
| <sup>b</sup> Q6. When should cancer patients receive PC? (N = 204)                                                |            |
| When cancer is first diagnosed                                                                                    | 30 (14.7)  |
| When cancer treatment is no longer helpful                                                                        | 171 (83.8) |
| With uncontrolled symptoms                                                                                        | 83 (40.7)  |
| When patients are psychologically disturbed                                                                       | 20 (9.8)   |
| When patients ask for PC                                                                                          | 56 (27.5)  |
| When survival is expected to be for less than 3 months                                                            | 37 (18.1)  |
| When survival is expected to be for less than 6 months                                                            | 38 (18.6)  |
| Others                                                                                                            | 10 (4.9)   |

<sup>a</sup> Respondents could respond with True, False, or Unknown. n (%) indicate correct answer frequencies.

<sup>b</sup> Respondents could select more than one item in response (thus, percentages add up to more than 100%).

<https://doi.org/10.1371/journal.pone.0238023.t002>

### 3. Diagnostic disclosure and breaking bad news (Q10-Q15)

Most of the participants (61.5%) believed they should inform patients of an unfavorable prognosis although the great majority (99.5%) believed that it is the doctor's responsibility to disclose diagnosis to patients. However, more than half (60.1%) preferred to disclose it to family members first (Table 3). The reasons invoked for rare or no disclosure of cancer diagnosis were (N = 39): negative psychological results (43.6%), difficulties in discussing the diagnosis (12.8%), provider is not prepared to deal with the situation (12.8%), lack of time (10.3%), the

**Table 3. Disease information disclosure and breaking bad news.**

| Q10-Q15 questions                                                                              | n (%)      |
|------------------------------------------------------------------------------------------------|------------|
| Q10. Is it important to disclose an unfavorable prognosis to patients? (N = 205)               |            |
| Yes                                                                                            | 126 (61.5) |
| No                                                                                             | 8 (3.9)    |
| If the patient requests disclosure                                                             | 4 (2.0)    |
| If the family/caregivers request disclosure                                                    | 19 (9.3)   |
| It depends on situations <sup>a</sup>                                                          | 48 (23.4)  |
| Q11. Must the health care provider reveal the cancer diagnosis to patient/caregiver? (N = 205) |            |
| Yes                                                                                            | 149 (72.7) |
| No                                                                                             | 19 (9.3)   |
| Rarely                                                                                         | 20 (9.8)   |
| Only at patient request                                                                        | 17 (8.3)   |
| Q12. Are patients/caregivers satisfied with the information you currently provide? (N = 202)   |            |
| Yes                                                                                            | 116 (57.4) |
| No                                                                                             | 86 (42.6)  |

<sup>a</sup> "It depends on the situation" - means decisions are on a case-by-case basis, considering the physical and psychological conditions, religion, and the cultural background of individuals.

<https://doi.org/10.1371/journal.pone.0238023.t003>

information is irrelevant to the patient (7.7%), and other reasons (12.9%). Most of the participants (88.2%) reported that their patients/caregivers often need more information regarding the disease. The most frequent reasons mentioned by physicians as to why patients/caregivers do not need more information about their illnesses were ( $N = 16$ ): they understand the information they received (56.3%), they are afraid to ask questions (31.3%), and they think patients have difficulty understanding medical language (12.5%).

#### 4. Treatment decisions (Q16-Q17)

In the fourth part of the questionnaire, 85.8% of the physicians believed that patients must give an opinion about their treatment decision, and the most frequent reasons were to improve compliance of the patient to the treatment (76.5%) and so patients could be aware of side effects (46.3%). Some of the respondents who preferred not to involve patients on treatment decisions thought that it is difficult for them to discuss treatment with patients (30%) or they do not have enough time to discuss treatments with patients (30%). The majority of participants agreed that family should contribute in discussions regarding treatment options for the patient (92.6%).

#### 5. Decision making and end-of-life issues (Q18-Q24)

Only 15.2% of the participants knew what advanced directives are (Q18), 50% knew what an order of “do-not-resuscitate” (Q19) is, and 43.3% choose to consider patient’s wish when he/she prefers to forgo life sustaining treatments (Q20). As described in [Table 4](#), 19.3% thought that terminally ill cancer patients should receive cardiopulmonary resuscitation.

#### 6. Euthanasia and related issues (Q25-29)

Most participants (89.4%) reported being familiar with euthanasia, 66.7% knew what “active euthanasia” is, 65.3% knew what “passive euthanasia” is, 38.8% knew what “physician-assisted suicide” is, and 51.3% knew what “palliative sedation” is. Overall, only 24.0% reported being familiar with all five euthanasia concepts. The years of practice distribution between the physicians familiar with all concepts was not found to be significantly different from the physicians not familiar with all concepts (both medians equal to 9 years;  $U = 3354$ ;  $W = 14529$ ;  $p = 0.663$ ).

## Discussion

### General knowledge and attitudes in palliative care

This was the first survey of palliative care knowledge and attitudes in Mozambique, surveying the main hospitals in the main regions of the country and the only provincial hospital with a standalone isolated provision of palliative care service. Although Xai-Xai is the only provincial hospital in the country with this service and had the highest percentage of correct answers, this difference was not considered significant. There was also no significant difference in the years of practice between physicians who correctly answered all five palliative care knowledge questions.

From a public health point of view and because Xai-Xai has a standalone palliative care service for more than 5 years, significant differences in knowledge, attitudes and practices were expected for these health professionals. There is a need in palliative care advocacy not only in Xai-Xai but in all hospitals with these service in Gaza Province. And the fact that no significant differences were found between the years of practice of those who responded correctly and those who did not, calls attention to the need to introduce the palliative care curricula for health students at all levels and training for health professionals regardless of years of practice.

**Table 4. Decision making and end-of-life issues.**

| Q21-Q24 questions                                                                                                                                            | n (%)      |
|--------------------------------------------------------------------------------------------------------------------------------------------------------------|------------|
| Q21. Do you approve using CPR for terminally ill cancer patients? (N = 202)                                                                                  |            |
| Yes                                                                                                                                                          | 39 (19.3)  |
| No                                                                                                                                                           | 94 (46.5)  |
| It depends on the situation <sup>a</sup>                                                                                                                     | 69 (34.2)  |
| <sup>b</sup> Q22. What factors do you believe will affect a patient and family's decision? (N = 201)                                                         |            |
| Disease prognosis                                                                                                                                            | 163 (81.1) |
| Symptom burden                                                                                                                                               | 105 (52.2) |
| Other disease and comorbidities                                                                                                                              | 114 (56.7) |
| Religious beliefs                                                                                                                                            | 136 (67.7) |
| Economic status                                                                                                                                              | 125 (62.2) |
| The patient's own wishes/preferences                                                                                                                         | 104 (51.7) |
| Past experiences with death                                                                                                                                  | 105 (52.2) |
| All selected                                                                                                                                                 | 80 (39.8)  |
| Q23. Should a conflict arise between the patient's wishes and the family's wishes in the decision-making process, who would you support? (N = 199)           |            |
| Patients                                                                                                                                                     | 66 (33.2)  |
| Family                                                                                                                                                       | 11 (5.5)   |
| It depends on the situation <sup>a</sup>                                                                                                                     | 122 (61.3) |
| Q24. If the patient is no longer competent and the family's wishes conflict with those previously expressed by the patient, who would you support? (N = 202) |            |
| Patients                                                                                                                                                     | 39 (19.3)  |
| Family                                                                                                                                                       | 45 (22.3)  |
| It depends on the situation <sup>a</sup>                                                                                                                     | 118 (58.4) |

<sup>a</sup>"It depends on the situation" means to decide on a case-by-case basis, considering the physical and psychological conditions, religion, and the cultural background of individuals.

<sup>b</sup> Respondents could select more than one item in response (thus, percentages add up to more than 100%).

<https://doi.org/10.1371/journal.pone.0238023.t004>

The results we obtained revealed that only 14.7% of the participants recommend palliative care when cancer is first diagnosed, which is lower than the 32.6% reported in a Chinese study [6]. Most professionals had the opinion that referral to palliative care should be done when patients can no longer undergo other anti-cancer therapies, which is similar to other countries [7]. However, this practice may have a negative impact on quality of life for some patients, because they are referred to palliative care at an advanced stage of disease. In our research, 87.3% believed that early palliative care integration could improve patients' quality of life, which is higher than the 72.5% reported for Chinese physicians [6], but less than 1/3 would recommend palliative care for cancer patients when patients attended the clinic for the first time.

The World Health Organization adopted a resolution to strengthen palliative care as a component of comprehensive lifelong care. This resolution emphasized the need to integrate palliative care into each country's health system to ensure access to all those in need, and also to

provide mandatory palliative care training and knowledge for health professionals. Palliative care should be introduced as early as possible in patients with severe illness, providing early guidance for symptom control, with the aim of improving quality of life, care satisfaction and reduction of costs related to the hospital course of these patients [9,10]. This can be achieved through advanced care planning and individual care goals considering values and preferences [11]. Some countries have developed legislation requiring palliative care to be provided at the time of diagnosis [12]. Over the years, these countries have adopted educational programs in order to improve doctors' knowledge so as to overcome their difficulties in this approach, and are already reporting positive results [13].

### **Diagnostic disclosure and breaking bad news**

Poor communication is one of the most common barriers to the provision of quality palliative care [12]. Disclosure of cancer diagnosis to a patient or caregiver is one of the most challenging communication tasks for physicians, considering that 25–35% of newly diagnosed patients present high levels of emotional distress [14]. Although interpersonal and communication skills are a core competency during the training of residents, this topic may not be a priority in surgical specialties [15]. Revealing a diagnosis of cancer is an art as is discussing the treatment options that follow. The discussion should be tailored to the individual with the involvement of family members, adapted to different patient needs [16]. The offer of physical treatment is considered the easiest discussion. However, disclosure of diagnosis and discussion of end-of-life issues are more challenging and uncomfortable [17]. Specific training on this is essential for quality palliative care.

When the patient has the capacity to understand and discernment to make decisions regarding the proposed treatment, it should be him/her, and only he/she, who consents. However, patients do not always have this capacity, and providers have to deal with incapacity situations, both in adults and minors [18]. In our study, the family-centered model of communication prevailed because most of the physicians preferred to first disclose diagnosis to family members rather than patients. Similar to our study, a Portuguese study described that some professionals prefer not to involve patients in treatment decisions, because they think it can negatively affect the patient psychologically [7]. However, when not involving the patient we are breaking the principle of patient autonomy.

### **Treatment decision and end-of-life issues**

Studies have shown an increase in aggressive care such as chemotherapy in the last month of life, particularly in cases where there is a lack of confrontation of end-of-life issues between doctors, patients, and caregivers. This can lead to a lower patient satisfaction, psychological distress, and poorer quality of life at the end of life [19]. In our study, there are some physicians who do not involve patients in the treatment decisions because it is difficult for them to discuss treatment with the patients. Clear consensus is lacking regarding retention or withdrawal of life-sustaining treatment, such as cardiopulmonary resuscitation, ventilatory support, artificial hydration, nutrition, sedative drugs used at the end-of-life, and terminology of euthanasia. Dr. Dame Cicely Saunders, founder of the modern palliative care movement, stated: "How people die is in the memory of those who live." Without a clear understanding of the ethical principles and policies that guide the management plans at the end-of-life, such care can lead to conflicts and dilemmas among health professionals [20].

Advance directives serves as a legal document that allows competent patients to give instructions on the health care they would like to receive when they are no longer competent to make their own decisions [21]. Not all countries have implemented these policies in their



health system. Advance directives are most discussed in very high income countries such as the USA, Canada, United Kingdom, Netherlands, and Switzerland [22–24]. Mozambique has no laws relating to end-of-life issues, and ethical principles of good medical practice prevail. Most participants evaluate individual cases before making a decision on questions related to cardiopulmonary resuscitation in situations where the patient's desires conflict with the wishes of the family, especially when the patient is no longer competent.

The decision to suspend or withdraw medical interventions ideally should be made with the family, to ensure that they understand the underlying reason for such decisions. In case of withdrawal refusal from the family, doctors should refer the case to a colleague for a second opinion and it is up to the latter to agree to continue treatment or to negotiate more with the family. Guiding principles at the end-of-life include autonomy and beneficence. However, patients have the right to refuse medical interventions even though they may be beneficial. The problem arises in the absence of advance directives and when the patient is no longer competent, resorting in this way to a legal representative. Because these are usually close relatives, they may make emotional decisions that represent their own preferences rather than the patient's [25].

One of the most common fears health professionals face is the use of end-of-life sedatives, since they associate this act with an acceleration of death due to hypotension and respiratory depression in debilitated patients. As a result, inadequate pain relief and sedation for terminal patients is common. In our sample, half of physicians claimed to know what palliative sedation is, but we believe not all of them use it in daily practice. Evidence has shown that if morphine and benzodiazepines are used properly to relieve end-of-life symptoms, they do not impact patient survival [26,27].

### Euthanasia and related issues

In this study, although few physicians were familiar with all concepts related to euthanasia (24%), the number is higher than the 14.5% reported in a Chinese study [6]. Interestingly, the years of practice between the physicians familiar with all concepts was not significantly different from the physicians not familiar with all concepts related to euthanasia.

### Limitations

Because the instrument was self-completed, not all questions were answered in all surveys. Only 4 hospitals were surveyed, so these results may not be generalizable to the whole country.

### Conclusions

Doctors of the three main hospitals of Mozambique and the only provincial hospital with a standalone palliative care service, have cursory knowledge about palliative care. Paternalism and the family-centered model are the most prevalent. Decision making is based on medical ethical principles considering each individual case, especially when the patient is no longer competent. Further research and palliative care education in the country is urgently needed to improve palliative care knowledge and practice in Mozambique.

### Author Contributions

**Conceptualization:** Emilia Pinto, Ferraz Gonçalves, Guilhermina Rego.

**Data curation:** Emilia Pinto, Ferraz Gonçalves, Luisa Castro.

**Formal analysis:** Emilia Pinto, Camila Walters, Luisa Castro.

**Funding acquisition:** Emilia Pinto.

**Investigation:** Emilia Pinto, Gustavo Marcos, Camila Walters, Ferraz Gonçalves, Jahit Sacarlal, Luisa Castro, Guilhermina Rego.

**Methodology:** Emilia Pinto, Gustavo Marcos, Camila Walters, Ferraz Gonçalves, Jahit Sacarlal, Luisa Castro, Guilhermina Rego.

**Project administration:** Emilia Pinto, Gustavo Marcos, Camila Walters, Ferraz Gonçalves, Jahit Sacarlal, Guilhermina Rego.

**Resources:** Emilia Pinto, Gustavo Marcos.

**Software:** Luisa Castro.

**Supervision:** Emilia Pinto, Gustavo Marcos, Ferraz Gonçalves, Jahit Sacarlal, Luisa Castro, Guilhermina Rego.

**Validation:** Emilia Pinto, Gustavo Marcos, Camila Walters, Ferraz Gonçalves, Jahit Sacarlal, Luisa Castro, Guilhermina Rego.

**Visualization:** Emilia Pinto, Ferraz Gonçalves, Luisa Castro.

**Writing – original draft:** Emilia Pinto, Gustavo Marcos, Camila Walters, Ferraz Gonçalves, Jahit Sacarlal, Luisa Castro.

**Writing – review & editing:** Emilia Pinto, Ferraz Gonçalves, Jahit Sacarlal, Luisa Castro, Guilhermina Rego.

## References

1. Hannon B, Zimmermann C, Knaul FM, et al. Provision of palliative care in low and middle-income countries: Overcoming obstacles for effective treatment delivery. *J Clin Oncol*. 2015; 34:62–68. <https://doi.org/10.1200/JCO.2015.62.1615> PMID: 26578612
2. Rhee JY, Garralda F, Torrado C, et al. Palliative Care in África: a scoping review from 2005–16. *Lancet Oncol*. 2017 Sep; 18(9):522–e531
3. Worldwide Hospice Palliative Care Alliance (WHPCA). 2014. Mapping levels of palliative care development: a global update. Available at <http://www.thewhpc.org/resources/global-atlas-on-end-of-life-care>
4. Morphine Survey Report A review of national opioid estimation procedures and supply chain mechanisms: Review done in three African countries: Swaziland, Mozambique and Zimbabwe, African Palliative Care Association, 2015
5. Waterworth S, Gott M. Decision making among older people with advanced heart failure as they transition to dependency and death. *Curr Opin Support Palliat Care*. 2010; 4 (4):238–42. <https://doi.org/10.1097/SPC.0b013e328340684f> PMID: 20966758
6. Gul X, Cheng W, Chinese oncologists' knowledge, attitudes and practice towards palliative care and end of life issues, *BMC Medical Education* 2016, 16:149 <https://doi.org/10.1186/s12909-016-0668-3> PMID: 27188161
7. Gonçalves F, Castro S. Diagnosis disclosure in a Portuguese oncological center. *Palliative Medicine* 2001; 15:35–41. <https://doi.org/10.1191/026921601676515878> PMID: 11212466
8. Tsang S, Royse CF, Terkawi AS. Guidelines for developing, translating, and validating a questionnaire in perioperative and pain medicine. *Saudi J Anaesth* 2017; 11:S80–9. [https://doi.org/10.4103/sja.SJA\\_203\\_17](https://doi.org/10.4103/sja.SJA_203_17) PMID: 28616007
9. Smith TJ, Temin S, Alesi ER, et al. American Society of Clinical Oncology provisional clinical opinion: The integration of palliative care into standard oncology care. *J Clin Oncol*. 2012; 30:880–887. <https://doi.org/10.1200/JCO.2011.38.5161> PMID: 22312101
10. The Way Forward National Framework: a roadmap for an integrated palliative approach to care, Quality End of Life Care Coalition and CHPCA, 2015. <http://www.hpcintegration.ca/media/60044/TWF-frameworkdoc>.
11. Institute of Medicine. *Dying in America: Improving Quality and Honoring Individual Preferences Near the End of Life*. Washington, DC: National Academies Press; 2014

12. Aldridge MD, Hasselaar J, Garraida E, et al. Education, implementation, and policy barriers to greater integration of palliative care: a literature review. *Palliat Med.* 2016; 30:224–239 <https://doi.org/10.1177/0269216315606645> PMID: 26405109
13. Nakazawa Y, Yamamoto R, et al. Improved knowledge of and difficulties in palliative care among physicians during 2008 and 2015 in Japan: Association with a nationwide palliative care education program. *Cancer.* 2018; 1; 124 (3):626–635.
14. Zabora J, BrintzenhofeSzoc K, Curbow B, Hooker C, Piantadosi S. The prevalence of psychological distress by cancer site. *Psychooncology.* 2001; 10(1):19–28. [https://doi.org/10.1002/1099-1611\(200101/02\)10:1<19::aid-pon501>3.0.co;2-6](https://doi.org/10.1002/1099-1611(200101/02)10:1<19::aid-pon501>3.0.co;2-6) PMID: 11180574
15. Lamba S, Tyrie LS, Bryczkowski S, Nagurka R. Teaching Surgery Residents the skills to communicate difficult news to Patient and family members: A Literature Review *Journal of Palliative Medicine.* 2015; 19(1):101–7. <https://doi.org/10.1089/jpm.2015.0292> PMID: 26575251
16. Kuroki LM et al. Disclosing a diagnosis of cancer: considerations specific to gynecologic oncology patients. 2013; 122(5):1033–9. <https://doi.org/10.1097/AOG.0b013e3182a9bf42> PMID: 24104784
17. The SUPPORT principal investigators (1995) A controlled trial to improve care for seriously ill hospitalized patients. *JAMA* 274: 1591–1598. PMID: 7474243
18. Pereira A. A capacidade de consentir. In Editora C, editor. *A parte Geral do Código Civil e a Teoria Geral do Direito Civil* 2006.199,249
19. Mack JW et al. Associations between end-of-life discussion characteristics and care received near death: a prospective cohort study. *J Clin Oncol.* 2012; 30(35):4387–95. <https://doi.org/10.1200/JCO.2012.43.6055> PMID: 23150700
20. Lim RBL. End-of-life care in patients with advanced lung cancer. *Therapeutic Advances in Respiratory Disease.* 2016; 10(5):455–67. <https://doi.org/10.1177/1753465816660925> PMID: 27585597
21. Nunes R. Diretivas Antecipadas de Vontade. *Medicina CFd*, editor 2016.132 p.
22. Clarke G, Fistein E, et al. Preferences for care towards the end of life when decision-making capacity may be impaired: A large scale cross-sectional survey of public attitudes in Great Britain and the United States. *journal.pone.*2017
23. Veshi D, Neitzke G Advance Directives in Some Western European Countries: A Legal and Ethical Comparison between Spain, France, England, and Germany. *Eur J Health Law.* 2015; 22(4):32 45
24. Sweatman LR, Sweatman MJ. The Carriage of Death: What Kind Does Canada Have? (PMID: 27169199) *Health law in Canada* 2016, 36(3):63–65]
25. Mack J et al. Associations Between End-of-Life Discussion Characteristics and Care Received Near Death: A Prospective Cohort Study. *J Clin Oncol.* 2012; 30(35): 4387–4395. <https://doi.org/10.1200/JCO.2012.43.6055> PMID: 23150700
26. Maltoni M, et al. Palliative sedation in end-of-life care and survival: a systematic review. *J Clin Oncol.* 2012; 30(12):1378–83 <https://doi.org/10.1200/JCO.2011.37.3795> PMID: 22412129
27. Juth N, Lindblad A, Lynöe N, Sjöstrand M, Helgesson G. European Association for Palliative Care (EAPC) framework for palliative sedation: an ethical discussion. *BMC Palliat Care.* 2010; 9: 20. <https://doi.org/10.1186/1472-684X-9-20> PMID: 20836861
